# Supplementary material for: Intrapulmonary shunt and alveolar dead space in a cohort of patients with acute COVID-19 pneumonitis and early recovery
Source: PubMed Central journal article supplement — Eur Respir J. Author manuscript; Available in PMC 2023 Jul 27. (PMC9515481; doi:10.1183/13993003.01117-2022), 2023-01-27

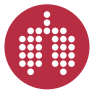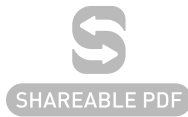

# Intrapulmonary shunt and alveolar dead space in a cohort of patients with acute COVID-19 pneumonitis and early recovery

Piotr Harbut<sup>1</sup>, G. Kim Prisk<sup>2</sup>, Robert Lindwall<sup>1</sup>, Sarah Hamzei<sup>1</sup>, Jenny Palmgren<sup>1</sup>, Catherine E. Farrow<sup>3,4,5</sup>, Goran Hedenstierna<sup>6,†</sup>, Terence C. Amis<sup>3,4,5</sup>, Atul Malhotra<sup>2</sup>, Peter D. Wagner<sup>2</sup> and Kristina Kairaitis<sup>3,4,5</sup>

<sup>1</sup>Karolinska Institutet, Danderyd Hospital, Stockholm, Sweden. <sup>2</sup>Department of Medicine, University of California, San Diego, CA, USA. <sup>3</sup>Ludwig Engel Centre for Respiratory Research, Westmead Institute for Medical Research, Sydney, Australia. <sup>4</sup>Department of Respiratory and Sleep Medicine, Westmead Hospital, Sydney, Australia. <sup>5</sup>Sydney Medical School, Faculty of Medicine and Health, University of Sydney, Sydney, Australia. <sup>6</sup>Department of Medical Sciences, University of Uppsala, Uppsala, Sweden. <sup>†</sup>Deceased.

Corresponding author: Kristina Kairaitis ([kristina.kairaitis@sydney.edu.au](mailto:kristina.kairaitis@sydney.edu.au))

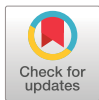

Shareable abstract (@ERSpublications)

**Hypoxaemia in COVID-19 is due to a variable combination of intrapulmonary shunt and increased dead space, likely from both airspace and vascular pathology. Increased dead space present up to 2 months later suggests persistent pulmonary vascular pathology.** <https://bit.ly/3ROTboc>

**Cite this article as:** Harbut P, Prisk GK, Lindwall R, *et al.* Intrapulmonary shunt and alveolar dead space in a cohort of patients with acute COVID-19 pneumonitis and early recovery. *Eur Respir J* 2023; 61: 2201117 [DOI: 10.1183/13993003.01117-2022].

This single-page version can be shared freely online.

Copyright ©The authors 2023.

This version is distributed under the terms of the Creative Commons Attribution Non-Commercial Licence 4.0. For commercial reproduction rights and permissions contact [permissions@ersnet.org](mailto:permissions@ersnet.org)

This article has an editorial commentary:  
<https://doi.org/10.1183/13993003.01962-2022>

Received: 2 June 2022  
Accepted: 22 Aug 2022

## Abstract

**Background** Pathological evidence suggests that coronavirus disease 2019 (COVID-19) pulmonary infection involves both alveolar damage (causing shunt) and diffuse microvascular thrombus formation (causing alveolar dead space). We propose that measuring respiratory gas exchange enables detection and quantification of these abnormalities. We aimed to measure shunt and alveolar dead space in moderate COVID-19 during acute illness and recovery.

**Methods** We studied 30 patients (22 males; mean±SD age 49.9±13.5 years) 3–15 days from symptom onset and again during recovery, 55±10 days later (n=17). Arterial blood (breathing ambient air) was collected while exhaled oxygen and carbon dioxide concentrations were measured, yielding alveolar–arterial differences for each gas ( $P_{A-aO_2}$  and  $P_{a-ACO_2}$ , respectively) from which shunt and alveolar dead space were computed.

**Results** For acute COVID-19 patients, group mean (range) for  $P_{A-aO_2}$  was 41.4 (–3.5–69.3) mmHg and for  $P_{a-ACO_2}$  was 6.0 (–2.3–13.4) mmHg. Both shunt (% cardiac output) at 10.4% (0–22.0%) and alveolar dead space (% tidal volume) at 14.9% (0–32.3%) were elevated (normal: <5% and <10%, respectively), but not correlated ( $p=0.27$ ). At recovery, shunt was 2.4% (0–6.1%) and alveolar dead space was 8.5% (0–22.4%) (both  $p<0.05$  versus acute). Shunt was marginally elevated for two patients; however, five patients (30%) had elevated alveolar dead space.

**Conclusions** We speculate impaired pulmonary gas exchange in early COVID-19 pneumonitis arises from two concurrent, independent and variable processes (alveolar filling and pulmonary vascular obstruction). For most patients these resolve within weeks; however, high alveolar dead space in ~30% of recovered patients suggests persistent pulmonary vascular pathology.

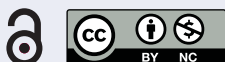

Supplement: ERJ-01117-2022.Shareable.pdf [file ERJ-01117-2022.Shareable.pdf]
